# Supplementary material
Source: PubMed Central journal article supplement (PMC6745296)
Supplement: NIHMS1524418-supplement-1.pdf [file NIHMS1524418-supplement-1.pdf]

## **SUPPLEMENTARY MATERIAL**

**Prognostic implications of blunted feature tracking global longitudinal strain during vasodilator cardiovascular magnetic resonance stress imaging**

## SUPPLEMENTARY FIGURES

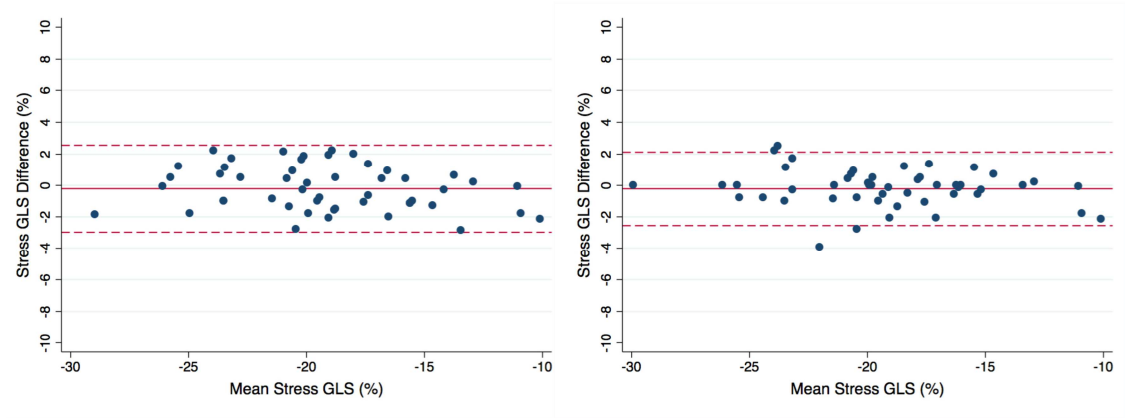

**Supplementary Figure 1. Bland-Altman analysis of stress GLS for interobserver (left panel) and intraobserver (right panel) variability. Solid line represents the bias. Dashed lines represents the 95% limits of agreement.**

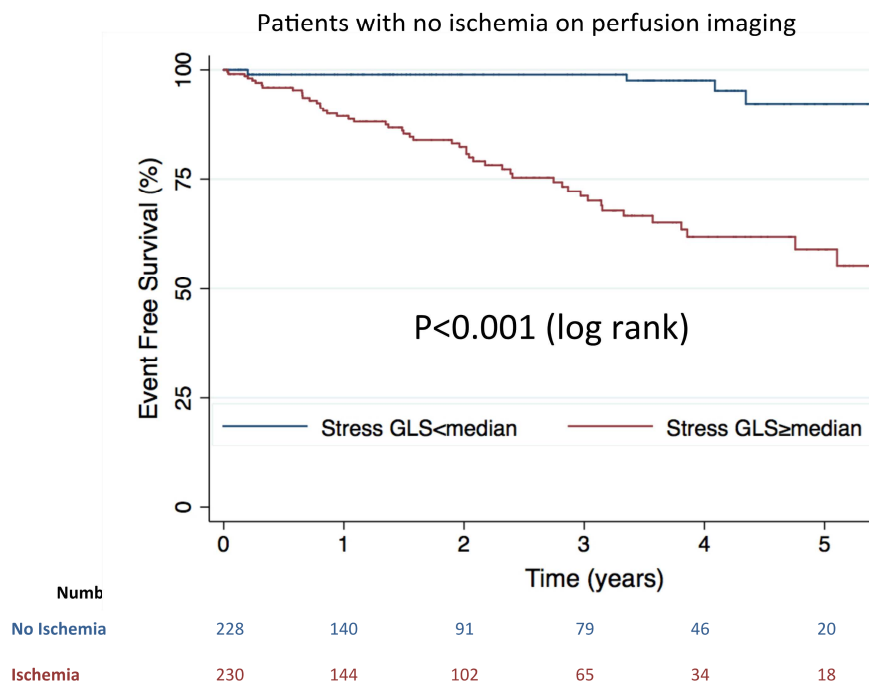

**Supplementary Figure 2. Kaplan-Meier curves stratified by stress GLS above and below the median value. Patients with no ischemia on perfusion imaging.**

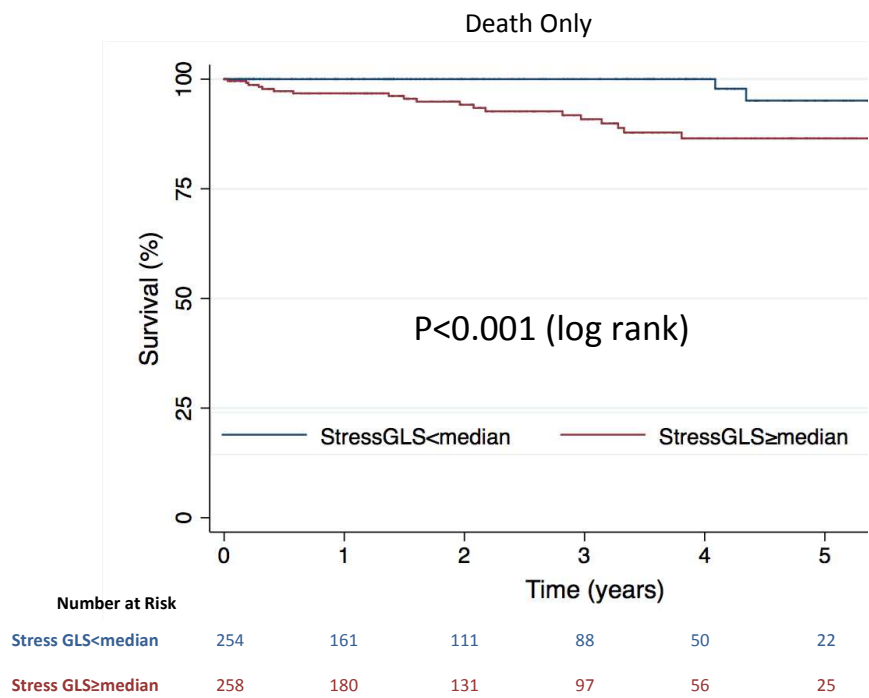

**Supplementary Figure 3. Kaplan-Meier curves, stratified by stress GLS above and below the median value. Endpoint of death only.**

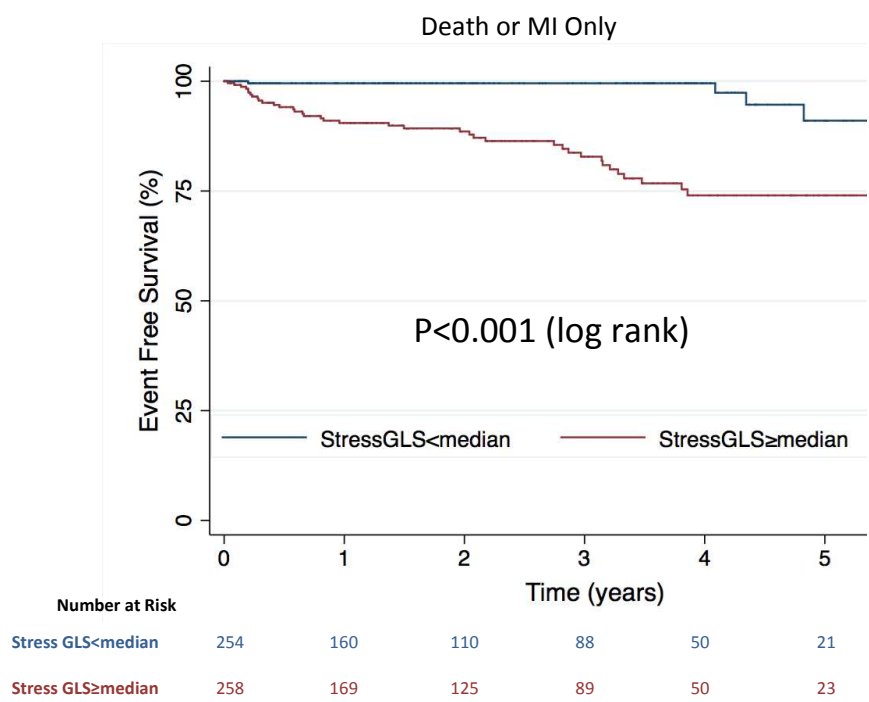

**Supplementary Figure 4. Kaplan-Meier curves, stratified by stress GLS above and below the median value. Combined endpoint of death or MI.**

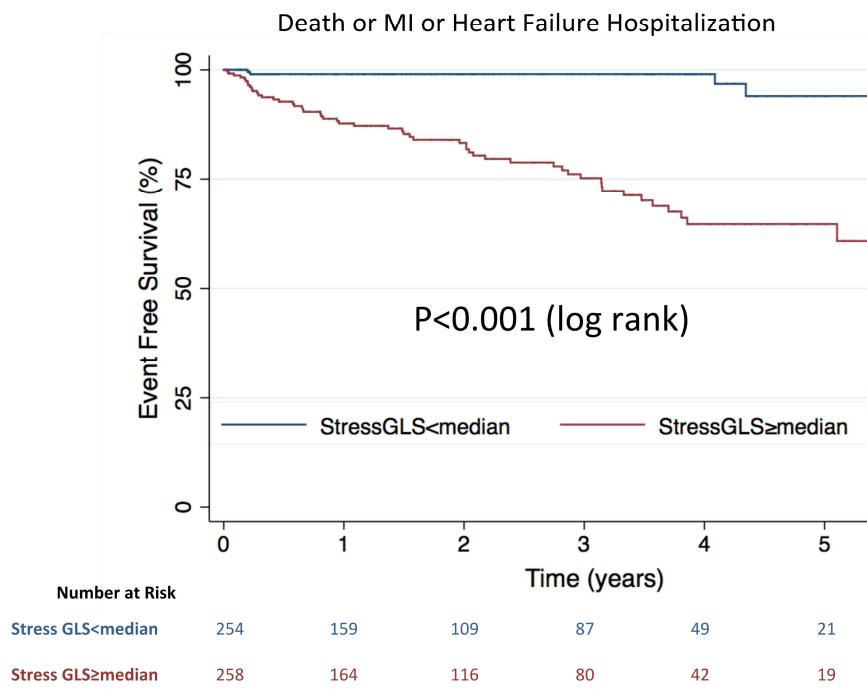

**Supplementary Figure 5. Kaplan-Meier curves stratified by stress GLS above and below the median value.** Combined endpoint of death, MI or heart failure hospitalization.

**SUPPLEMENTARY TABLES**

| <b>VARIABLES</b>        | <b>Final Multivariable Model For MACE</b> |                  |
|-------------------------|-------------------------------------------|------------------|
|                         | <b>Hazard Ratio (95% CI)</b>              | <b>P Value</b>   |
| <b>Male</b>             | 1.571 (0.976-2.527)                       | 0.063            |
| <b>LVEF<sup>‡</sup></b> | <b>1.017 (1.001-1.032)</b>                | <b>0.037</b>     |
| <b>Stress GLS*</b>      | <b>1.278 (1.212-1.348)</b>                | <b>&lt;0.001</b> |
| <b>Ischemia Extent</b>  | 1.012 (0.997-1.026)                       | 0.108            |

**Supplementary Table. Final multivariable model of MACE.** Model was constructed using LGE size and Ischemia extent included as initial covariates. GLS=Global longitudinal strain, LVEF=Left Ventricular Ejection Fraction, <sup>‡</sup>per % decrease, \*per %
